# Supplementary material
Source: PubMed Central journal article supplement (PMC3448801)

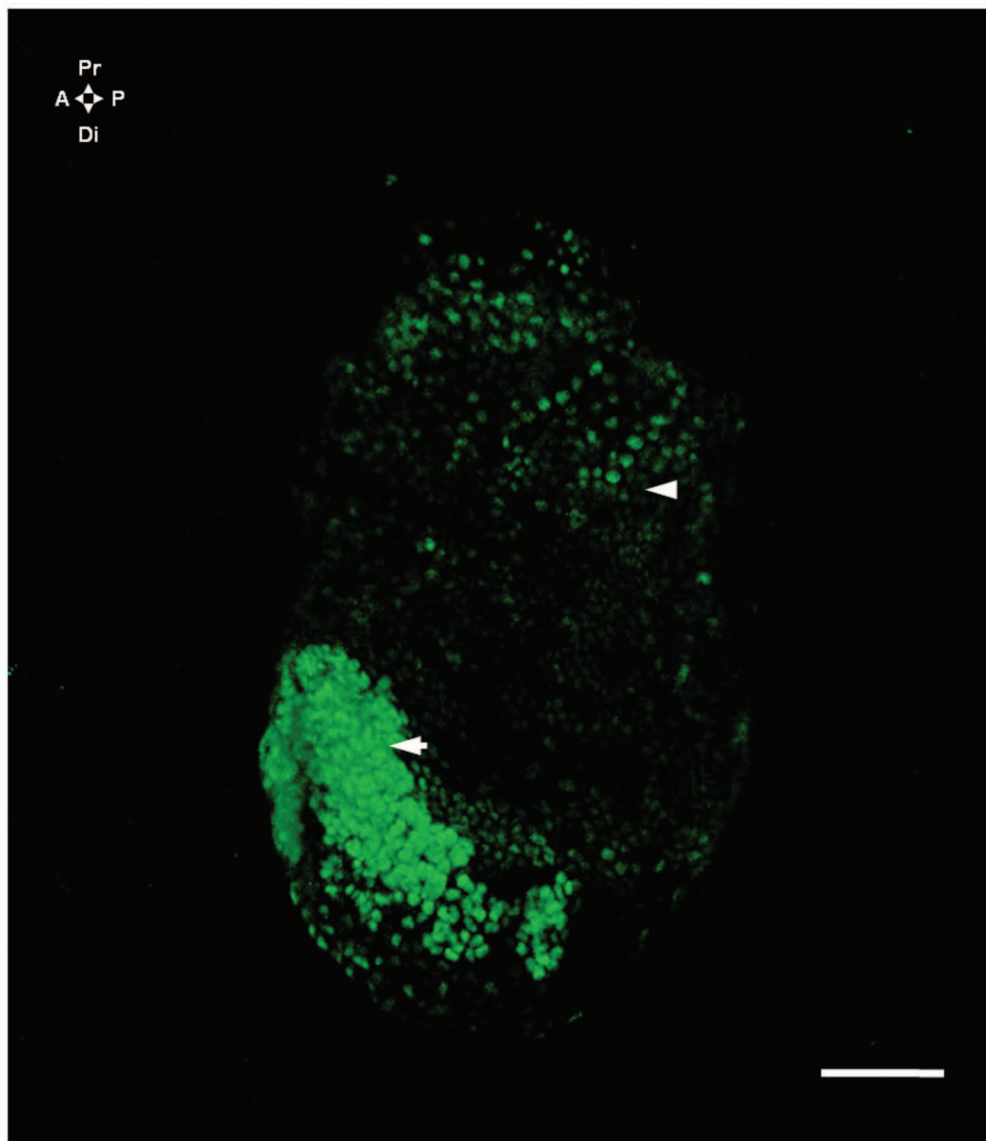

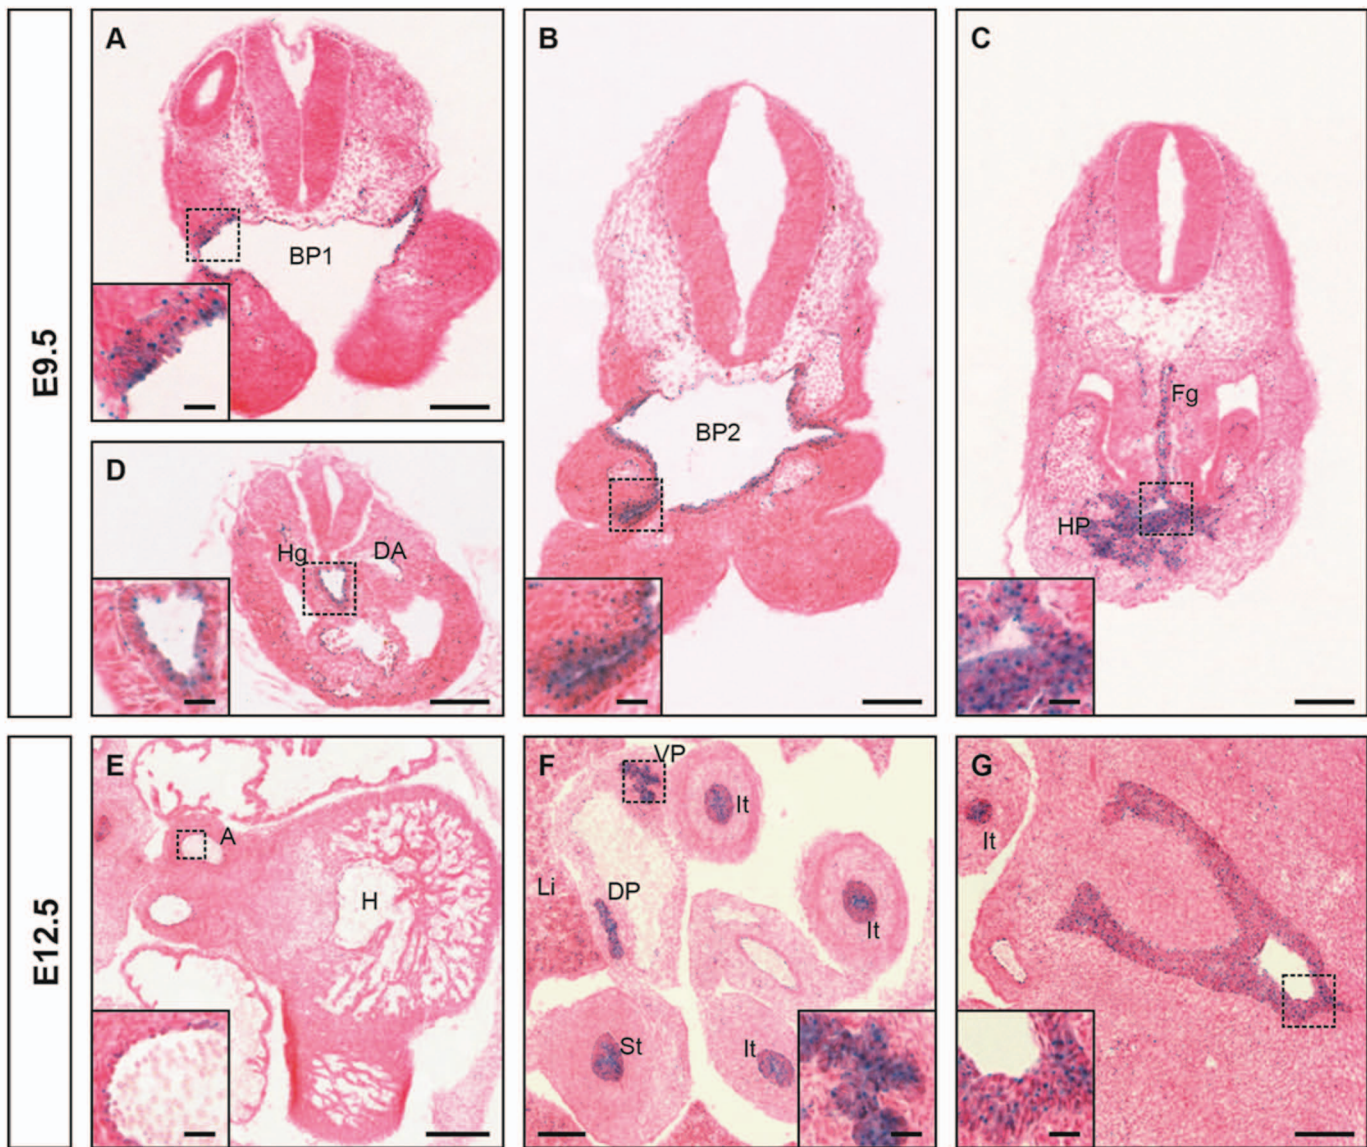

A

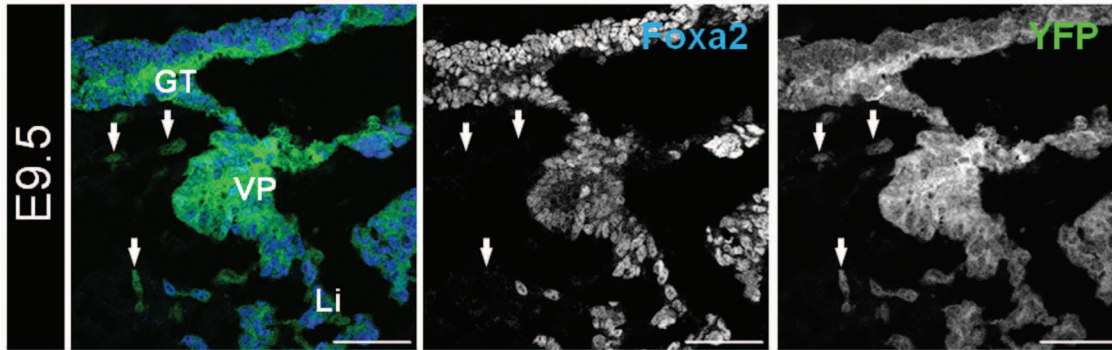

B

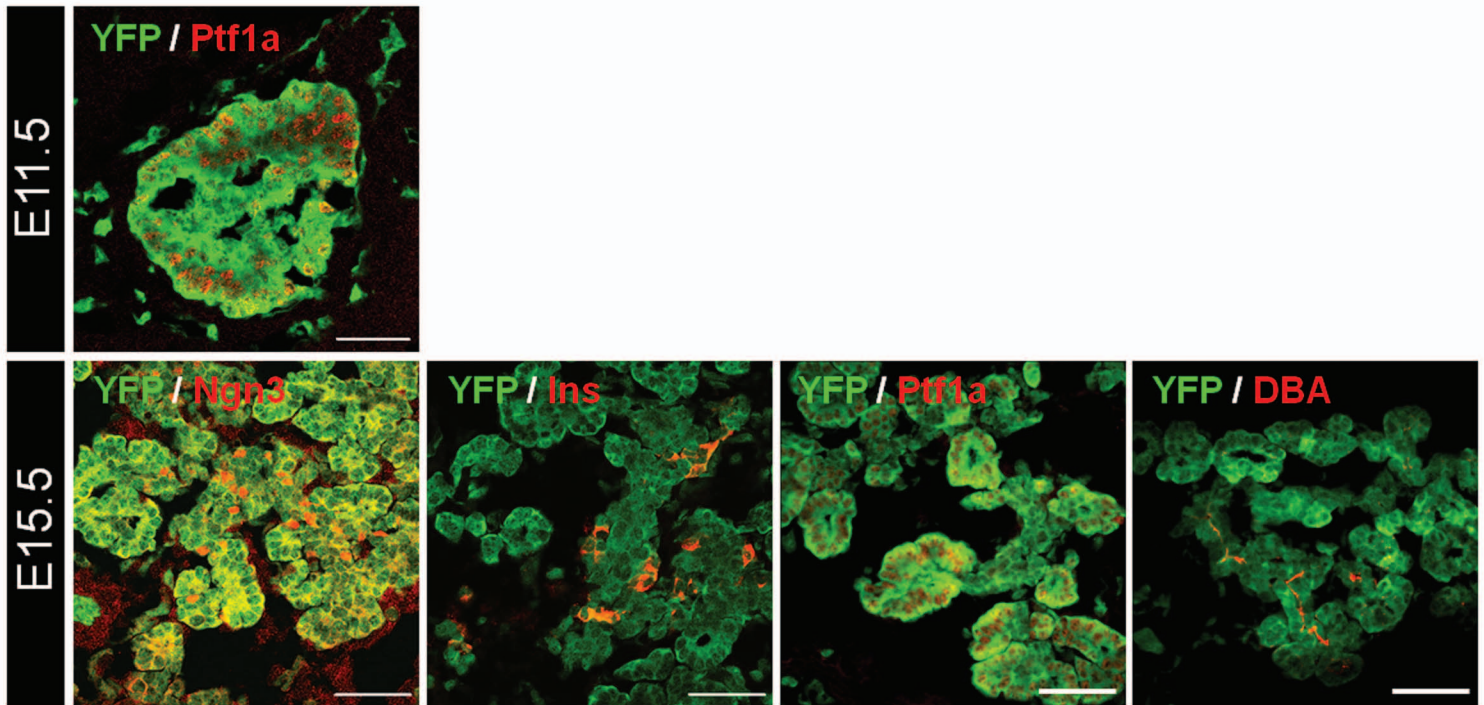



A

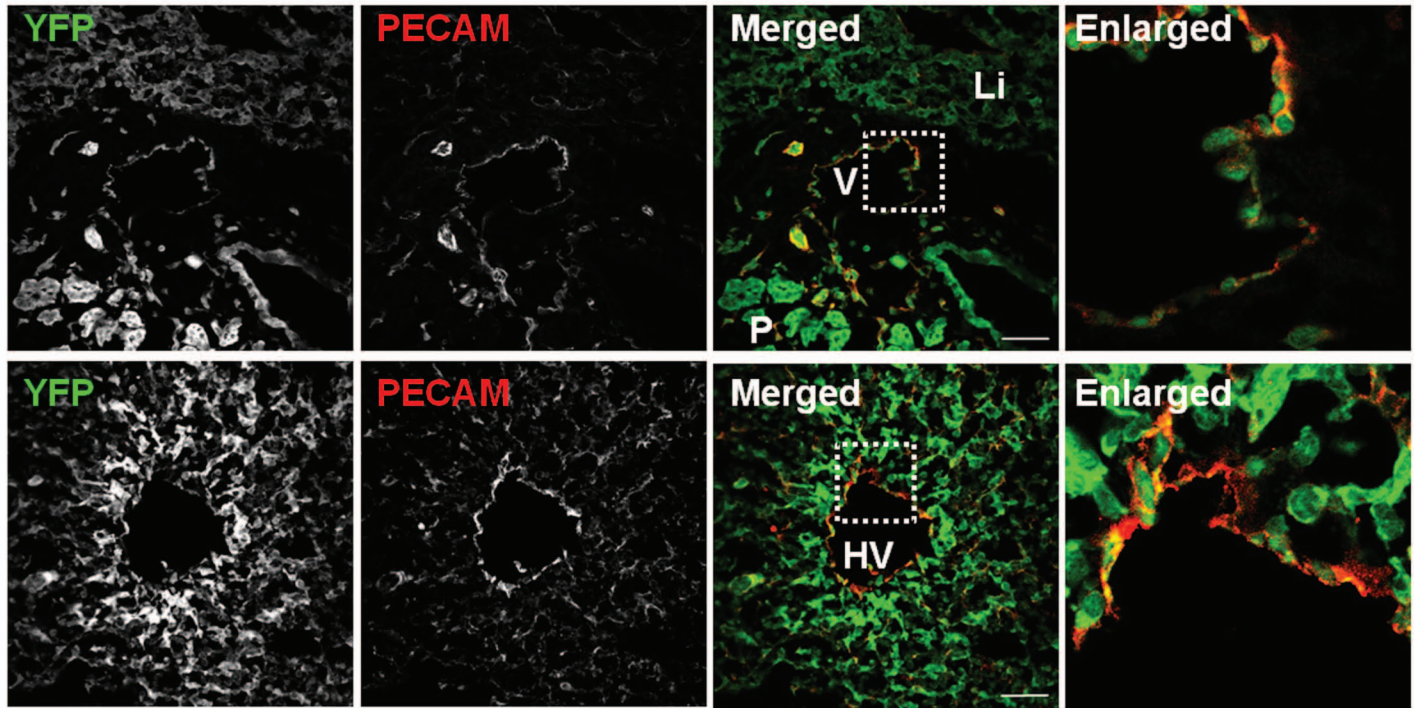

B

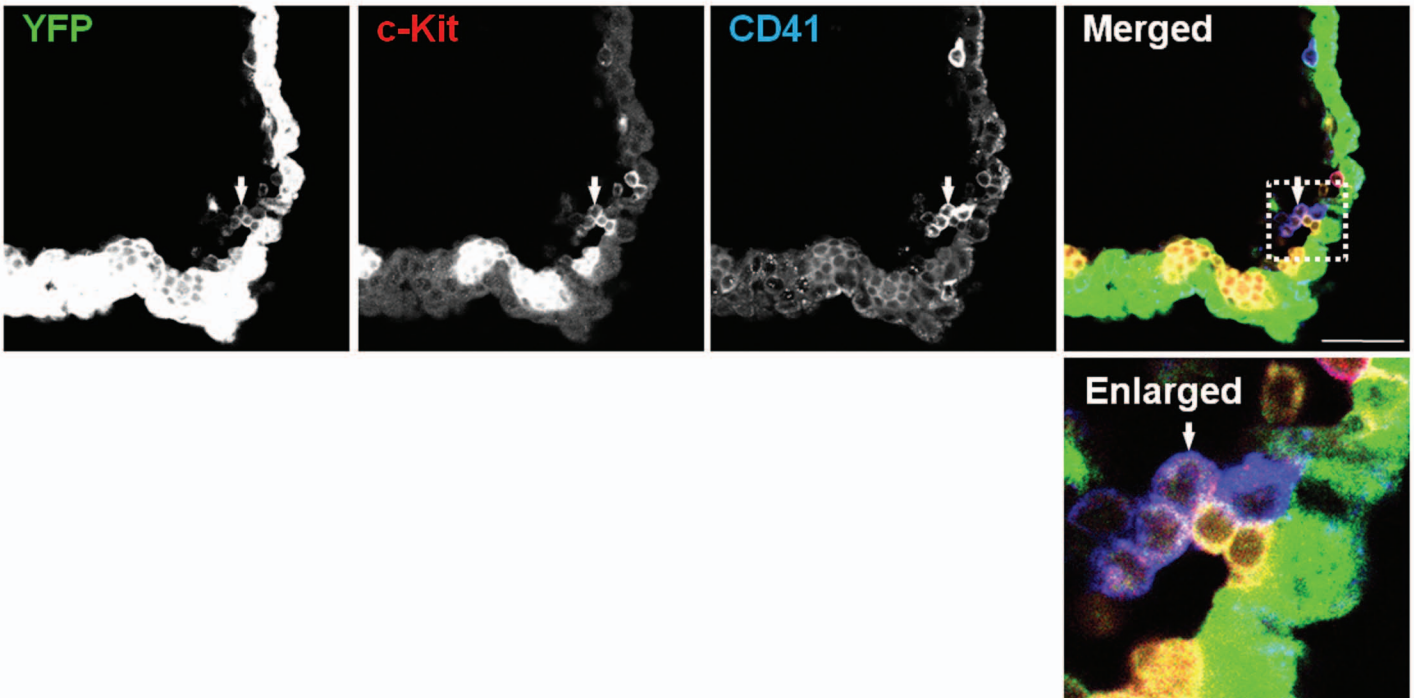

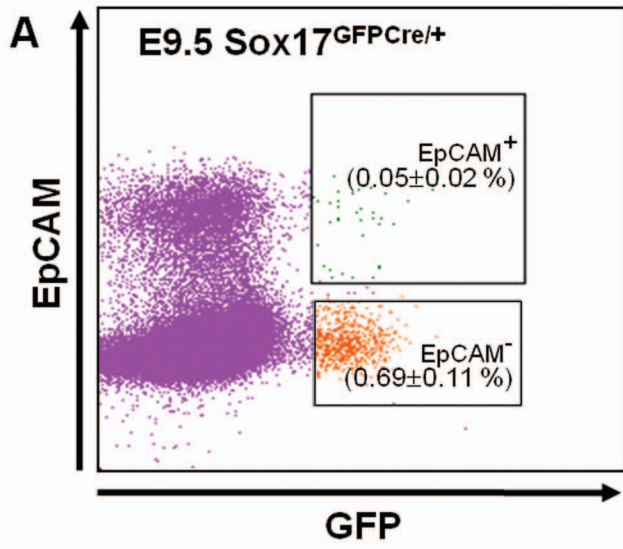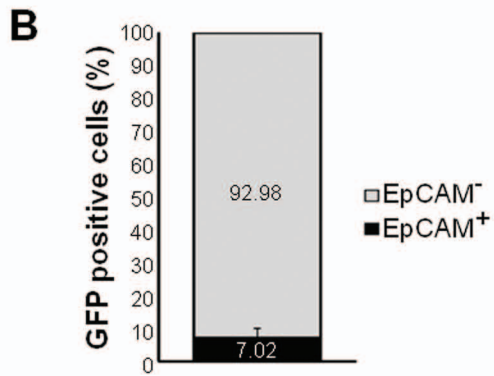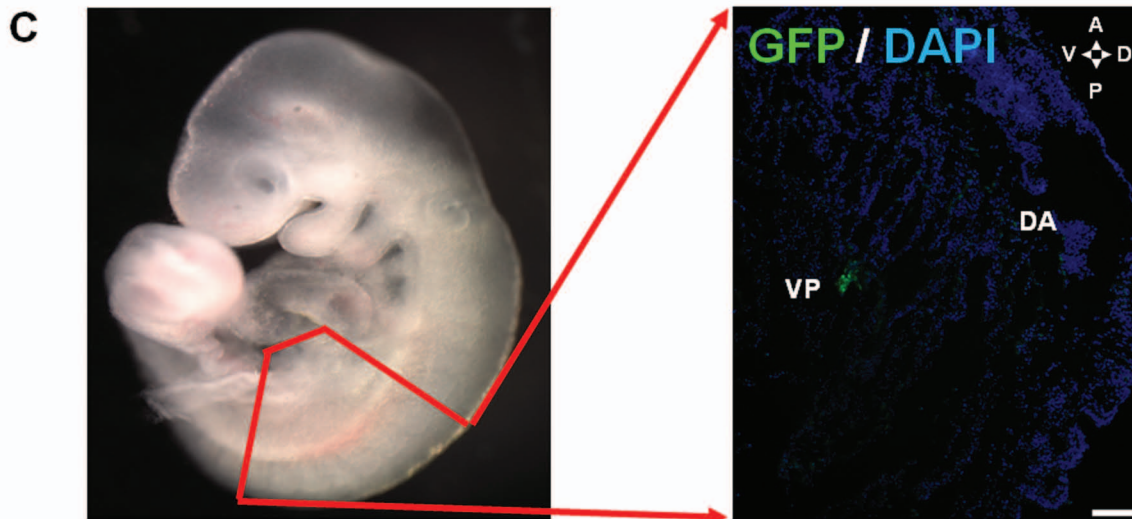

# Mark Magnuson, Supplemental Figure 6 "Top"

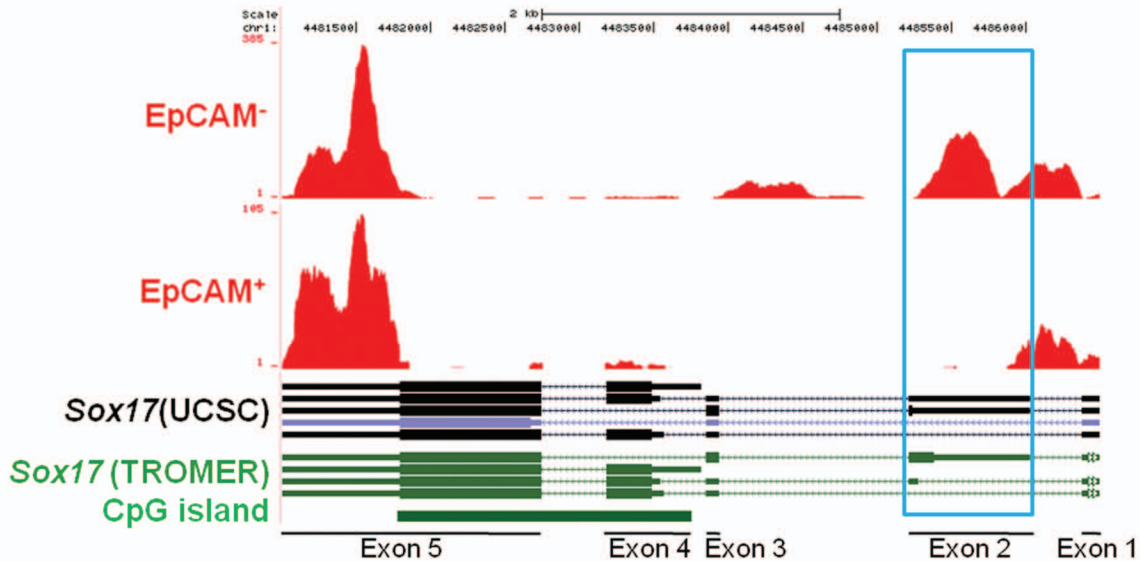

Supplement: NIHMS398935-supplement-Supp_Fig_S1-S6.pdf [file NIHMS398935-supplement-Supp_Fig_S1-S6.pdf]
